# Supplementary material
Source: PubMed Central journal article supplement (PMC6612519)
Supplement: mmc1.pdf [file mmc1.pdf]

**Supplemental Data**

**Genes for Good: Engaging the Public  
in Genetics Research via Social Media**

**Katharine Brieger, Gregory J.M. Zajac, Anita Pandit, Johanna R. Foerster, Kevin W. Li, Aubrey C. Annis, Ellen M. Schmidt, Chris P. Clark, Karly McMorrow, Wei Zhou, Jingjing Yang, Alan M. Kwong, Andrew P. Boughton, Jinxi Wu, Chris Scheller, Tanvi Parikh, Alejandro de la Vega, David M. Brazel, Maia Frieser, Gianna Rea-Sandin, Lars G. Fritsche, Scott I. Vrieze, and Gonçalo R. Abecasis**

Table S1. Comparison of Genes for Good cohort (genotyped diabetes cases and controls) to NHANES' cohort.

| <b>Diabetes Cases and Controls, Genotyped Samples</b> |                   |                         |                      |                           |
|-------------------------------------------------------|-------------------|-------------------------|----------------------|---------------------------|
|                                                       | GfG Cases (N=948) | GfG Controls (N=16,581) | NHANES Cases (N=809) | NHANES Controls (N=4,796) |
| <b>BMI</b>                                            | 35.71 (8.63)      | 29.11 (7.79)            | 32.58 (7.75)         | 28.80 (6.83)              |
| Underweight                                           | 1.0%              | 1.9%                    | 0.5%                 | 1.7%                      |
| Normal weight                                         | 8.4%              | 34.6%                   | 12.5%                | 30.0%                     |
| Overweight                                            | 17.0%             | 27.4%                   | 29.0%                | 32.0%                     |
| Obese                                                 | 73.6%             | 36.1%                   | 58.0%                | 36.3%                     |
| <b>Age</b>                                            |                   |                         |                      |                           |
| <21                                                   | 1.1%              | 6.3%                    | 0.1%                 | 7.0%                      |
| 21-30                                                 | 8.1%              | 40.0%                   | 2.8%                 | 19.1%                     |
| 31-40                                                 | 21.3%             | 28.3%                   | 5.7%                 | 18.3%                     |
| 41-50                                                 | 20.1%             | 11.7%                   | 12.0%                | 16.4%                     |
| 51-60                                                 | 27.7%             | 8.2%                    | 21.5%                | 14.9%                     |
| 61-70                                                 | 16.5%             | 4.3%                    | 31.1%                | 12.3%                     |
| >70                                                   | 5.2%              | 1.1%                    | 26.7%                | 11.8%                     |
| <b>Sex</b>                                            |                   |                         |                      |                           |
| Female                                                | 65.8%             | 68.5%                   | 45.7%                | 52.8%                     |
| Male                                                  | 34.2%             | 31.5%                   | 54.3%                | 47.2%                     |
| <b>Race</b>                                           |                   |                         |                      |                           |
| Hispanic                                              | 7.4%              | 8.4%                    | 38.1%                | 29.8%                     |
| Asian                                                 | 1.0%              | 3.9%                    | 8.9%                 | 12.5%                     |
| Black                                                 | 3.1%              | 2.6%                    | 23.6%                | 20.8%                     |
| White                                                 | 79.8%             | 76.2%                   | 26.1%                | 33.1%                     |
| Multiracial/Other                                     | 8.7%              | 8.9%                    | 3.3%                 | 3.9%                      |
| <b>Income</b>                                         |                   |                         |                      |                           |
| <\$35K                                                | 33.7%             | 26.6%                   | 50.6%                | 38.7%                     |
| \$35K-\$75K                                           | 38.0%             | 38.1%                   | 30.3%                | 31.6%                     |
| \$75K-\$100K                                          | 14.4%             | 15.3%                   | 6.9%                 | 10.8%                     |
| >\$100K                                               | 13.9%             | 20.0%                   | 12.2%                | 19.0%                     |
| <b>Education</b>                                      |                   |                         |                      |                           |
| No HS                                                 | 3.5%              | 2.0%                    | 32.8%                | 22.7%                     |
| HS Diploma                                            | 16.3%             | 11.3%                   | 21.9%                | 23.0%                     |
| Some college or Associate's degree                    | 45.8%             | 41.3%                   | 27.6%                | 29.6%                     |
| Bachelor's or higher                                  | 34.5%             | 45.5%                   | 17.7%                | 26.2%                     |

Table S2. Genome-wide significant hits for various pigmentation and health phenotypes.

**Note: This table is large and therefore is included as an Excel file.**

All associations are consistent with findings in previous studies: except for the hair texture hits at rs1918719 and rs7499783. CHR, chromosome; POS38, build 38 chromosome position; EA, effect allele; EAF, effect allele frequency; N, number of participants included in analysis; SE, standard error.

\* Associations not reported in previous studies.

Table S3. Comparison of Genes for Good top GWAS hits to previously reported results.

Note: This table is large and therefore is included as an Excel file.

\* Associations not reported in previous studies.

Replications of the top three hits from various studies of pigmentation and health traits<sup>3,11</sup>. Direction of effect for all variants is consistent between the reference studies and Genes for Good, and most Genes for Good results attain at least nominal significance ( $p < 0.05$ ). EA, effect allele; N, number of participants included in analysis; OR, odds (log-additive) ratio.

Table S4. Comparison of Genes for Good asthma results to previously reported results.

Note: This table is large and therefore is included as an Excel file.

\* Associations not reported in previous studies.

Genes for Good replications of eighteen asthma hits found in Demenais et al.<sup>11</sup>. Adjustments to odds ratios (OR) and sample sizes were made using the approach of Duffy et al.<sup>12</sup> to correct for response misclassification. Power calculations were made at the 0.05 significance level using the Genes for Good adjusted sample size, disease frequencies and relative risk values from Demenais et al.<sup>11</sup> control samples, 7.7% population prevalence, and an additive disease model. EA, effect allele; N, number of participants included in analysis.

Figure S1. GWAS panel of common traits in Genes for Good.

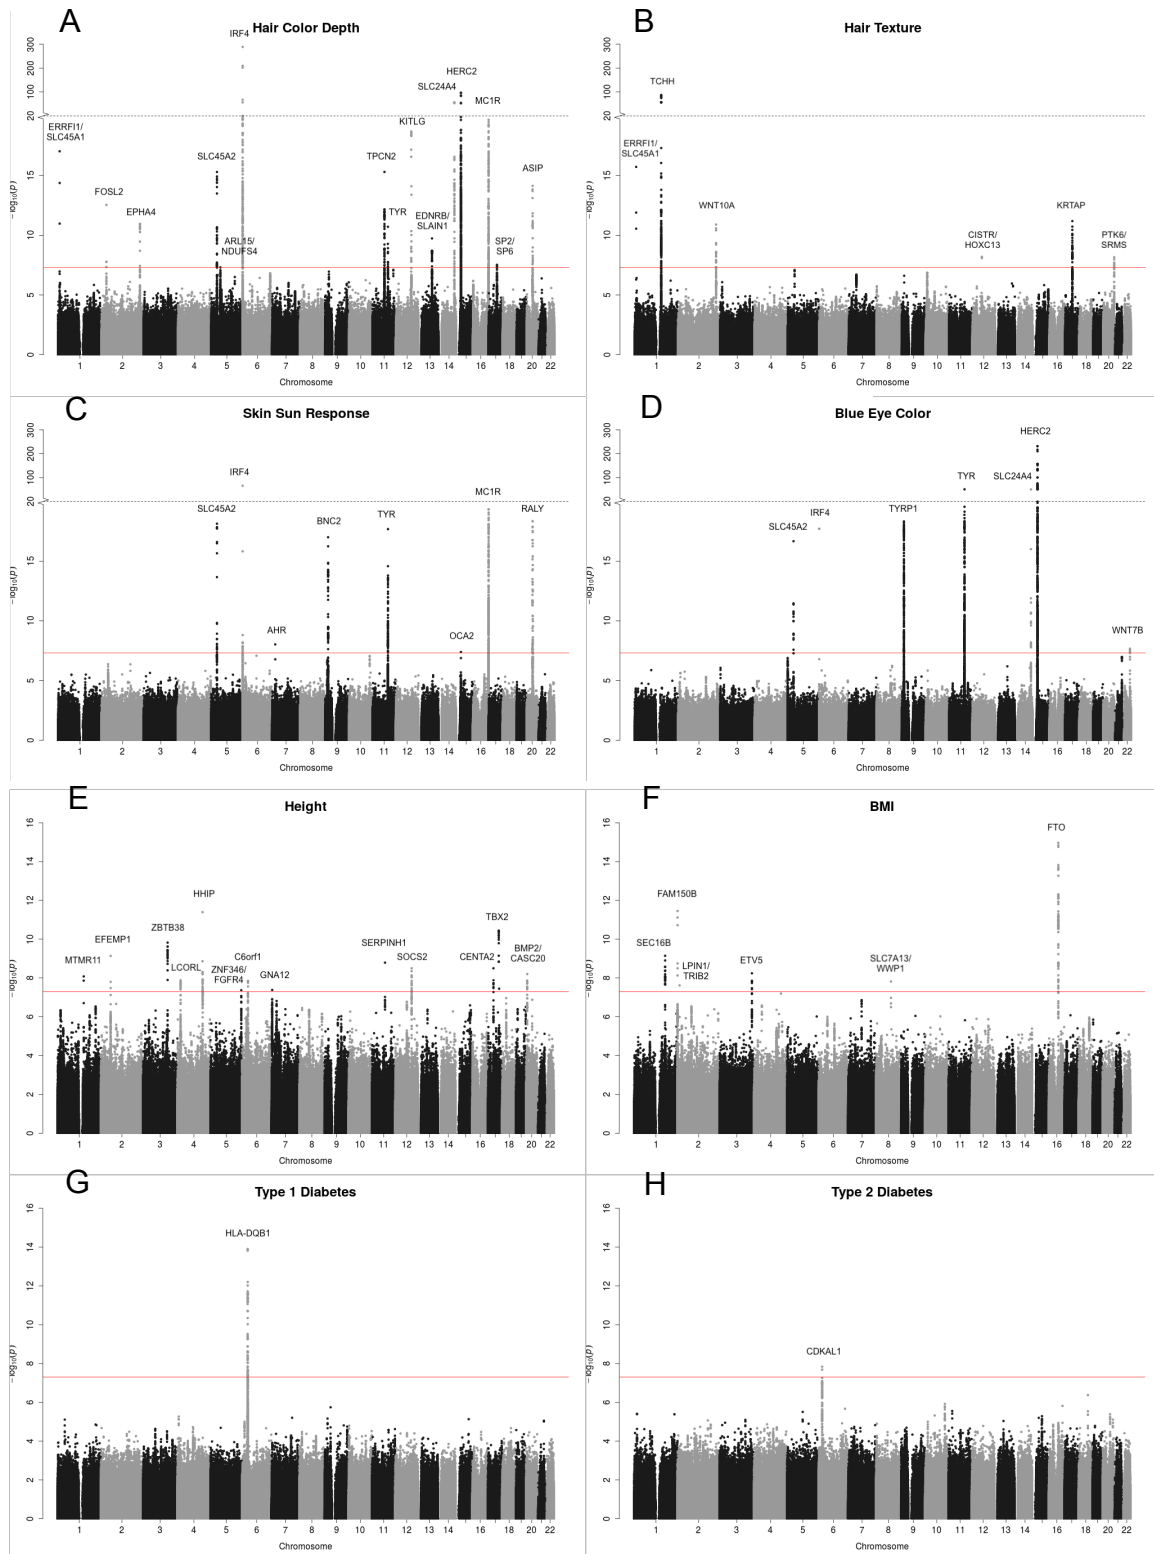

Figure S1. Manhattan plots for GWAS analysis of various pigmentation and health traits. The x-axis indicates chromosomal location. The y-axis represents  $-\log_{10}(\text{p-value})$ . The red line indicates genome-wide significance ( $p = 5 \times 10^{-8}$ ). Each genome-wide significant locus is labeled with the gene nearest to it.

Figure S2. Survey completion count for Health History surveys available in Genes for Good.

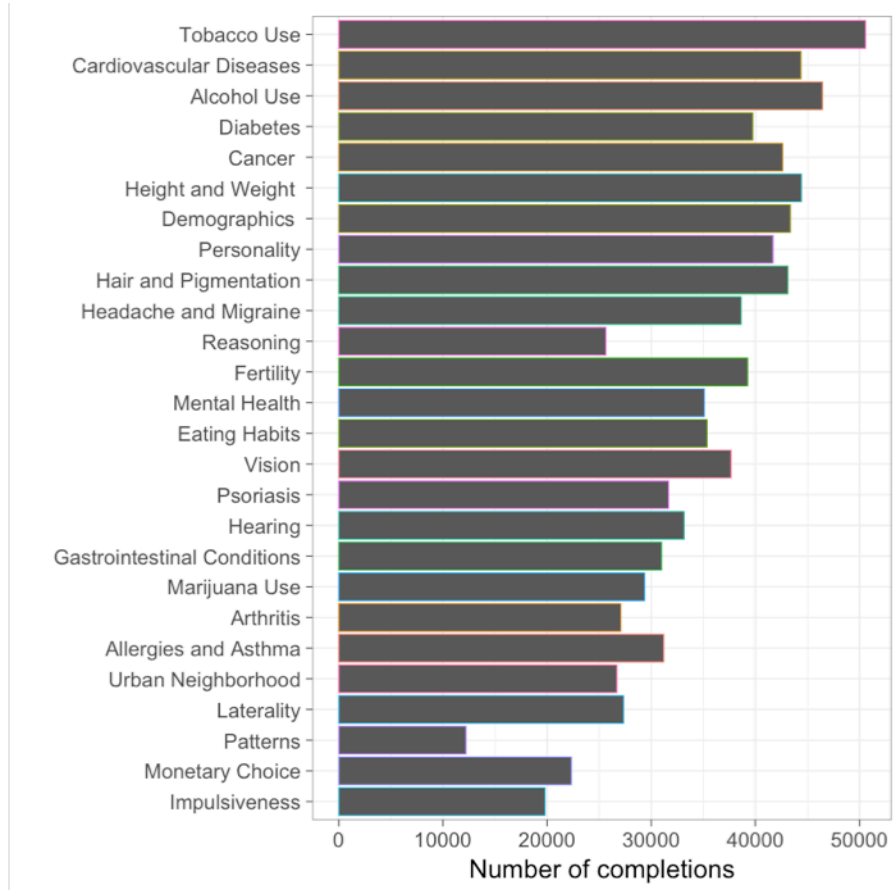

Survey completion count for Genes for Good surveys. Surveys are ordered by date implemented, with the oldest surveys at the top. The first ten surveys were all available at launch. The Reasoning and Patterns surveys are known to be on the longer side.

Figure S3. Histogram of Health History and Daily Tracking survey completion.

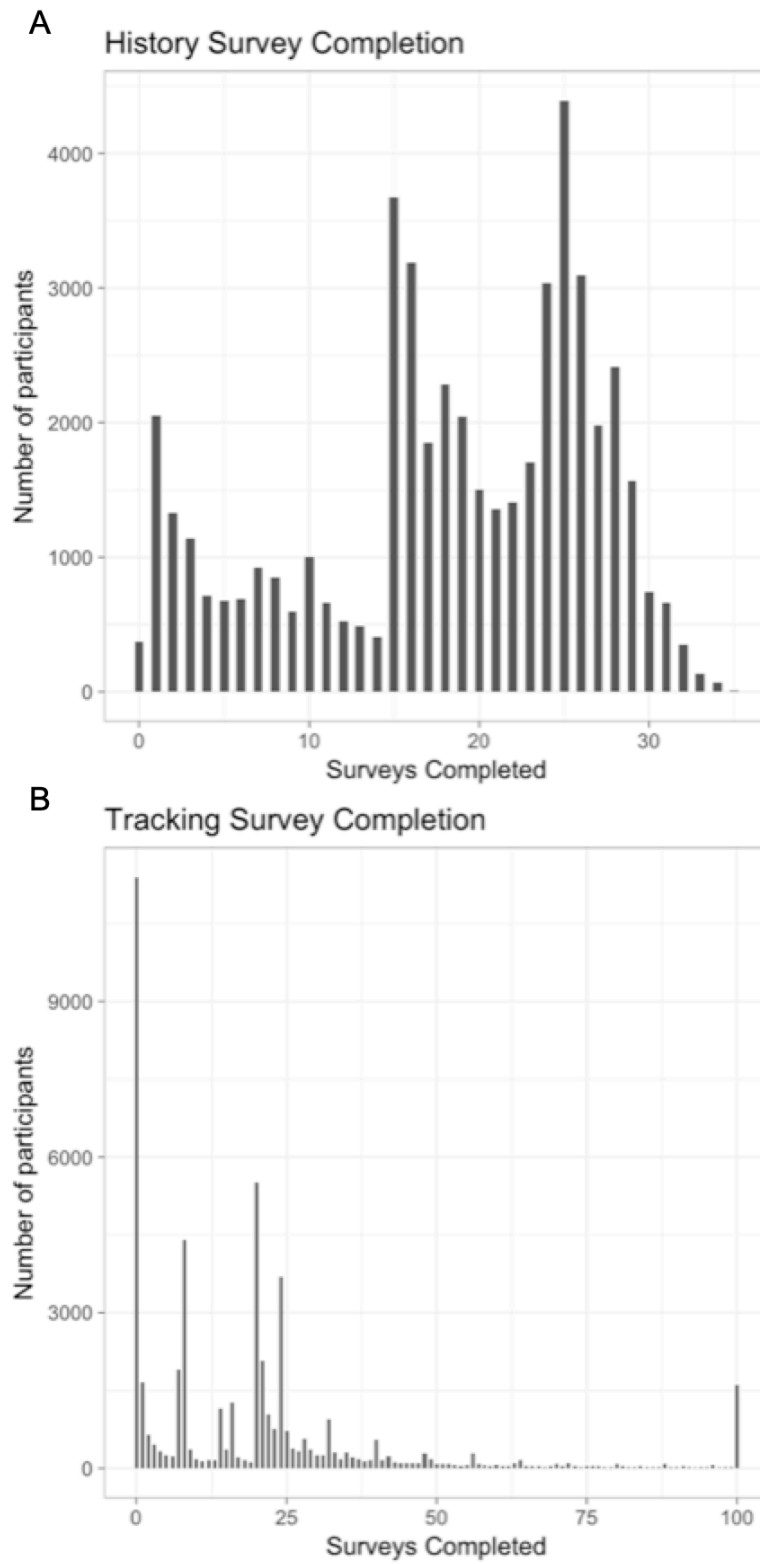

## References

1. CDC, and NCHS. (2017). National Health and Nutrition Examination Survey Data 2015-2016. Hyattsville, MD: US Department of Health and Human Services, Centers for Disease Control and Prevention, National Center for Health Statistics, <https://wwwn.cdc.gov/Nchs/Nhanes/Search/DataPage.aspx?Component=Examination&CycleBeginYear=2015>.
2. McMahon, A., Malangone, C., Suveges, D., Sollis, E., Cunningham, F., Riat, H.S., MacArthur, J.A.L., Hayhurst, J., Morales, J., Guillen, J.A., et al. (2018). The NHGRI-EBI GWAS Catalog of published genome-wide association studies, targeted arrays and summary statistics 2019. *Nucleic Acids Research* 47, D1005-D1012.
3. Hysi, P.G., Valdes, A.M., Liu, F., Furlotte, N.A., Evans, D.M., Bataille, V., Visconti, A., Hemani, G., McMahon, G., Ring, S.M., et al. (2018). Genome-wide association meta-analysis of individuals of European ancestry identifies new loci explaining a substantial fraction of hair color variation and heritability. *Nat Genet* 50, 652-656.
4. Liu, F., Chen, Y., Zhu, G., Hysi, P.G., Wu, S., Adhikari, K., Breslin, K., Pospiech, E., Hamer, M.A., Peng, F., et al. (2018). Meta-analysis of genome-wide association studies identifies 8 novel loci involved in shape variation of human head hair. *Hum Mol Genet* 27, 559-575.
5. Visconti, A., Duffy, D.L., Liu, F., Zhu, G., Wu, W., Chen, Y., Hysi, P.G., Zeng, C., Sanna, M., Iles, M.M., et al. (2018). Genome-wide association study in 176,678 Europeans reveals genetic loci for tanning response to sun exposure. *Nat Commun* 9, 1684.
6. Sulem, P., Gudbjartsson, D.F., Stacey, S.N., Helgason, A., Rafnar, T., Jakobsdottir, M., Steinberg, S., Gudjonsson, S.A., Palsson, A., Thorleifsson, G., et al. (2008). Two newly identified genetic determinants of pigmentation in Europeans. *Nat Genet* 40, 835-837.
7. Wood, A.R., Esko, T., Yang, J., Vedantam, S., Pers, T.H., Gustafsson, S., Chu, A.Y., Estrada, K., Luan, J., Kutalik, Z., et al. (2014). Defining the role of common variation in the genomic and biological architecture of adult human height. *Nat Genet* 46, 1173-1186.
8. Locke, A.E., Kahali, B., Berndt, S.I., Justice, A.E., Pers, T.H., Day, F.R., Powell, C., Vedantam, S., Buchkovich, M.L., Yang, J., et al. (2015). Genetic studies of body mass index yield new insights for obesity biology. *Nature* 518, 197-206.
9. Bycroft, C., Freeman, C., Petkova, D., Band, G., Elliott, L.T., Sharp, K., Motyer, A., Vukcevic, D., Delaneau, O., O'Connell, J., et al. (2018). The UK Biobank resource with deep phenotyping and genomic data. *Nature* 562, 203-209.
10. Mahajan, A., Taliun, D., Thurner, M., Robertson, N.R., Torres, J.M., Rayner, N.W., Payne, A.J., Steinthorsdottir, V., Scott, R.A., Grarup, N., et al. (2018). Fine-mapping type 2 diabetes loci to single-variant resolution using high-density imputation and islet-specific epigenome maps. *Nat Genet* 50, 1505-1513.
11. Demenais, F., Margaritte-Jeannin, P., Barnes, K.C., Cookson, W.O.C., Altmüller, J., Ang, W., Barr, R.G., Beaty, T.H., Becker, A.B., Beilby, J., et al. (2017). Multi-ancestry association study identifies new asthma risk loci that colocalize with immune-cell enhancer marks. *Nat Genet* 50, 42-53.
12. Duffy, S.W., Warwick, J., Williams, A.R.W., Keshavarz, H., Kaffashian, F., Rohan, T.E., Nili, F., and Sadeghi-Hassanabadi, A. (2004). A simple model for potential use with a misclassified binary outcome in epidemiology. *Journal of Epidemiology and Community Health* 58, 712-717.
